# Supplementary material for: A Kinetic Platform to Determine the Fate of Nitric Oxide in Escherichia coli
Source: PLOS journal article supplement (doi:10.1371/journal.pcbi.1003049), 2013-05-02
Supplement: S18 (10.1371/journal.pcbi.1003049.s018) [file journal.pcbi.1003049.s018]

**Table S4. Uncertain model parameters.** “Reaction #s” are the numbers of the reactions governed by the rate parameter, and correspond to the numbering in Tables S2–S3, and Text S1. Allowed parameter ranges (defined by “Min.” and “Max.”) were chosen to encompass the value(s) obtained or calculated from literature, unless otherwise noted. “Optimal” are the parameter values from the optimization yielding the lowest SSR between the predicted and experimentally-measured [NO•] curve for wild-type *E. coli* treated with DPTA under aerobic conditions. Confidence intervals (C.I.) are provided for parameters that were informed by the optimization, and were calculated as the range of optimal parameter values obtained for the top 10% of optimization outcomes (those with the lowest SSR values).

| #  | Parameter                                         | Parameter description/reaction involved                                 | Reaction #s | Min.                  | Max.                  | Optimal                | C.I.                                           | Units                        | Ref.         |
|----|---------------------------------------------------|-------------------------------------------------------------------------|-------------|-----------------------|-----------------------|------------------------|------------------------------------------------|------------------------------|--------------|
| 1  | $k_{\text{NO}\cdot\text{[Fe-S]}}$                 | [Fe-S] nitrosylation by NO•                                             | 85,86       | $1.0 \times 10^4$     | $1.0 \times 10^8$     | $1.40 \times 10^7$     | --                                             | $\text{M}^{-2}\text{s}^{-1}$ | [1]          |
| 2  | $k_{\text{DNIC-rem}}$                             | DNIC removal from protein                                               | 87,89       | 1                     | 100                   | 75.8                   | --                                             | $\text{M}^{-1}\text{s}^{-1}$ | [2]          |
| 3  | $k_{\text{DNIC-bind}}$                            | DNIC binding to apoprotein                                              | 88,90       | 1                     | 100                   | 84.3                   | --                                             | $\text{M}^{-1}\text{s}^{-1}$ | [2]          |
| 4  | $k_{\text{DNIC-deg}}$                             | O <sub>2</sub> -mediated DNIC degradation                               | 91          | 0.1                   | 100                   | 52.5                   | --                                             | $\text{M}^{-1}\text{s}^{-1}$ | [3]          |
| 5  | $k_{\text{IscU-load-Fe}}$                         | IscA-mediated Fe <sup>2+</sup> transfer to IscU                         | 92,93       | $2.5 \times 10^{-3}$  | 2.5                   | 1.10                   | --                                             | $\text{s}^{-1}$              | [4]          |
| 6  | $K_{\text{IscU-load-S,Cys}}$                      | IscS-mediated S transfer from Cys to IscU                               | 151,152     | $1.0 \times 10^{-6}$  | $1.0 \times 10^{-4}$  | $7.00 \times 10^{-5}$  | --                                             | M                            | [5]          |
| 7  | $K_{\text{IscU-load-S,IscU}}$                     | IscS-mediated S transfer from Cys to IscU                               | 151,152     | $1.0 \times 10^{-6}$  | $1.0 \times 10^{-4}$  | $4.39 \times 10^{-5}$  | --                                             | M                            | [5,6]        |
| 8  | $k_{\text{IscU-2Fe2S-insert,cat}}$                | IscU-mediated [2Fe-2S] insertion into apoprotein                        | 153,154     | $1.0 \times 10^{-4}$  | 0.1                   | 0.037                  | --                                             | $\text{s}^{-1}$              | [7]          |
| 9  | $K_{\text{IscU-2Fe2S-insert,P2Fe2S(apo)}}$        | IscU-mediated [2Fe-2S] insertion into apoprotein                        | 153,154     | $1.0 \times 10^{-6}$  | $1.0 \times 10^{-4}$  | $8.42 \times 10^{-5}$  | --                                             | M                            | [7]          |
| 10 | $k_{\text{IscU-4Fe4S-insert}}$                    | IscU-mediated [4Fe-4S] insertion into apoprotein                        | 94          | 1                     | 500                   | 182                    | --                                             | $\text{M}^{-1}\text{s}^{-1}$ | [8]          |
| 11 | $k_{\text{dN-deam}}$                              | N <sub>2</sub> O <sub>3</sub> -mediated DNA base deamination            | 95–97       | $1.0 \times 10^3$     | $1.0 \times 10^6$     | $9.41 \times 10^5$     | --                                             | $\text{M}^{-1}\text{s}^{-1}$ | [9]          |
| 12 | $K_{\text{dX-excis,DNA(dX)}}$                     | Excision of xanthine from DNA                                           | 155         | $1.0 \times 10^{-8}$  | $1.0 \times 10^{-6}$  | $2.88 \times 10^{-7}$  | --                                             | M                            | [10]         |
| 13 | $K_{\text{dI-excis,DNA(dI)}}$                     | Excision of hypoxanthine from DNA                                       | 156         | $1.0 \times 10^{-8}$  | $1.0 \times 10^{-6}$  | $6.68 \times 10^{-7}$  | --                                             | M                            | [11]         |
| 14 | $K_{\text{dU-excis,DNA(dU)}}$                     | Excision of uracil from DNA                                             | 157         | $1.0 \times 10^{-8}$  | $1.0 \times 10^{-6}$  | $6.60 \times 10^{-7}$  | --                                             | M                            | [12]         |
| 15 | $k_{\text{Hmp,NO}\cdot\text{-on}}$                | Hmp detoxification; NO• binding to Hmp-Fe <sup>2+</sup>                 | 110,113,118 | $4.0 \times 10^6$     | $2.6 \times 10^7$     | $4.13 \times 10^6$     | $(4.01\text{--}4.57) \times 10^6$              | $\text{M}^{-1}\text{s}^{-1}$ | [13]         |
| 16 | $k_{\text{Hmp,NO}\cdot\text{-ox}}$                | Hmp detoxification; NO• binding to Hmp-Fe <sup>2+</sup> -O <sub>2</sub> | 103,108,125 | $9.6 \times 10^8$     | $2.4 \times 10^9$     | $1.14 \times 10^9$     | --                                             | $\text{M}^{-1}\text{s}^{-1}$ | [13]         |
| 17 | $k_{\text{Hmp-exp,max}}$                          | Hmp expression (maximum rate)                                           | 177         | $2.0 \times 10^{-10}$ | $2.0 \times 10^{-8}$  | $1.93 \times 10^{-8}$  | $(1.79\text{--}2.00) \times 10^{-8}$           | $\text{M}\cdot\text{s}^{-1}$ | <sup>a</sup> |
| 18 | $K_{\text{Hmp-exp,NO}\cdot}$                      | Hmp expression (regulatory NO• interaction)                             | 177         | $1.0 \times 10^{-8}$  | $1.0 \times 10^{-5}$  | $3.38 \times 10^{-7}$  | $1.3 \times 10^{-8}$ –<br>$1.0 \times 10^{-6}$ | M                            | <sup>b</sup> |
| 19 | $k_{\text{NorV-exp,max}}$                         | NorV expression (maximum rate)                                          | 178         | $2.0 \times 10^{-10}$ | $2.0 \times 10^{-8}$  | $6.81 \times 10^{-9}$  | --                                             | $\text{M}\cdot\text{s}^{-1}$ | <sup>a</sup> |
| 20 | $K_{\text{NorV-exp,NO}\cdot}$                     | NorV expression (regulatory NO• interaction)                            | 178         | $1.0 \times 10^{-8}$  | $1.0 \times 10^{-5}$  | $9.41 \times 10^{-6}$  | --                                             | M                            | <sup>b</sup> |
| 21 | $k_{\text{NorV-O}_2}$                             | O <sub>2</sub> -mediated NorV inactivation                              | 146,147     | 10                    | 1000                  | 549                    | 113–658                                        | $\text{M}^{-1}\text{s}^{-1}$ | [14]         |
| 22 | $k_{\text{NrfA-exp,max}}$                         | NrfA expression (maximum rate)                                          | 179         | $2.0 \times 10^{-10}$ | $2.0 \times 10^{-8}$  | $7.72 \times 10^{-9}$  | --                                             | $\text{M}\cdot\text{s}^{-1}$ | <sup>a</sup> |
| 23 | $K_{\text{NrfA-exp,NO}_2^-}$                      | NrfA expression (regulatory NO <sub>2</sub> <sup>−</sup> interaction)   | 179         | $1.0 \times 10^{-6}$  | $1.0 \times 10^{-3}$  | $9.32 \times 10^{-4}$  | --                                             | M                            | <sup>c</sup> |
| 24 | $K_{\text{NrfA-exp,O}_2}$                         | NrfA expression (regulatory O <sub>2</sub> interaction)                 | 179         | $1.0 \times 10^{-12}$ | $1.0 \times 10^{-10}$ | $3.45 \times 10^{-11}$ | --                                             | M                            | <sup>c</sup> |
| 25 | [Cys] <sub>0</sub>                                | Initial concentration of cysteine                                       | --          | $5.0 \times 10^{-5}$  | $2.0 \times 10^{-4}$  | $1.51 \times 10^{-4}$  | --                                             | M                            | [15,16]      |
| 26 | [Trx <sub>red</sub> ] <sub>0</sub>                | Initial concentration of reduced thioredoxin                            | --          | $5.0 \times 10^{-6}$  | $5.0 \times 10^{-5}$  | $2.89 \times 10^{-5}$  | --                                             | M                            | [17,18]      |
| 27 | [IscU] <sub>0</sub>                               | Initial concentration of IscU                                           | --          | $1.0 \times 10^{-8}$  | $1.0 \times 10^{-5}$  | $9.48 \times 10^{-6}$  | --                                             | M                            | [5,19]       |
| 28 | [IscS] <sub>0</sub>                               | Initial concentration of IscS                                           | --          | $1.0 \times 10^{-8}$  | $1.0 \times 10^{-5}$  | $4.68 \times 10^{-6}$  | --                                             | M                            | [5,19]       |
| 29 | [P <sub>2Fe2S</sub> ( <i>holo</i> )] <sub>0</sub> | Initial concentration of <i>holo</i> [2Fe-2S] proteins                  | --          | $1.0 \times 10^{-6}$  | $1.0 \times 10^{-4}$  | $9.86 \times 10^{-5}$  | --                                             | M                            | [20,21]      |
| 30 | [P <sub>4Fe4S</sub> ( <i>holo</i> )] <sub>0</sub> | Initial concentration of <i>holo</i> [4Fe-4S] proteins                  | --          | $5.0 \times 10^{-5}$  | $5.0 \times 10^{-4}$  | $4.27 \times 10^{-4}$  | --                                             | M                            | [20,21]      |
| 31 | [LigA] <sub>0</sub>                               | Initial concentration of DNA ligase                                     | --          | $1.0 \times 10^{-8}$  | $1.0 \times 10^{-5}$  | $5.73 \times 10^{-6}$  | --                                             | M                            | [22]         |
| 32 | [PolI] <sub>0</sub>                               | Initial concentration of DNA polymerase                                 | --          | $1.0 \times 10^{-8}$  | $1.0 \times 10^{-5}$  | $4.40 \times 10^{-6}$  | --                                             | M                            | [22]         |
| 33 | [DNA(dN)] <sub>0</sub>                            | Initial concentration of DNA bases (dA,dC,dG)                           | --          | 0.001                 | 0.1                   | 0.085                  | --                                             | M                            | [21]         |
| 34 | [Xth] <sub>0</sub>                                | Initial concentration of DNA exonuclease III                            | --          | $1.0 \times 10^{-9}$  | $1.0 \times 10^{-6}$  | $9.07 \times 10^{-7}$  | --                                             | M                            | [23]         |
| 35 | [GS-FDH] <sub>0</sub>                             | Initial concentration of GSH-dependent FDH                              | --          | $1.0 \times 10^{-8}$  | $1.0 \times 10^{-5}$  | $3.94 \times 10^{-6}$  | --                                             | M                            | <sup>d</sup> |
| 36 | [AlkA] <sub>0</sub>                               | Initial concentration of DNA glycosylase (dX, dI)                       | --          | $1.0 \times 10^{-9}$  | $1.0 \times 10^{-6}$  | $9.35 \times 10^{-7}$  | --                                             | M                            | [23]         |
| 37 | [Ung] <sub>0</sub>                                | Initial concentration of DNA glycosylase (dU)                           | --          | $1.0 \times 10^{-9}$  | $1.0 \times 10^{-6}$  | $9.05 \times 10^{-7}$  | --                                             | M                            | [23]         |

|    |                    |                                               |    |                      |                      |                       |    |   |      |
|----|--------------------|-----------------------------------------------|----|----------------------|----------------------|-----------------------|----|---|------|
| 38 | [Cyo] <sub>0</sub> | Initial concentration of cytochrome <i>bo</i> | -- | $1.0 \times 10^{-8}$ | $1.0 \times 10^{-5}$ | $3.66 \times 10^{-6}$ | -- | M | [23] |
| 39 | [Cyd] <sub>0</sub> | Initial concentration of cytochrome <i>bd</i> | -- | $1.0 \times 10^{-8}$ | $1.0 \times 10^{-5}$ | $2.99 \times 10^{-6}$ | -- | M | [23] |

- a.* The maximum protein expression rates for Hmp, NorV, and NrfA were not found in literature. The allowed parameter range was chosen based on the maximum expression rates reported for a number of enzymes in the work of Kotte *et al* [24]. Values were converted from the reported units of  $g_{\text{protein}}/g_{\text{DW}} \cdot s$  to  $M \cdot s^{-1}$  assuming a cell density of 448 gDW/L [21], and ranged from approximately  $2 \times 10^{-10}$  (Acs) to  $2 \times 10^{-8} M \cdot s^{-1}$  (PfkA).
- b.* The allowed range for the NO• binding constant governing Hmp and NorV expression was chosen based on the reported physiological concentrations of NO• existing in the nM to  $\mu M$  range [25,26].
- c.* The NO<sub>2</sub><sup>-</sup> binding constant governing NrfA expression was allowed to vary in the  $\mu M$  range, while the O<sub>2</sub> inhibition constant was assumed to be much lower, given that NrfA expression is primarily anaerobic [27,28].
- d.* Concentration was not found in literature, and therefore allowed a wide range, spanning values typically found for other enzymes in the model.

## References

1. Duan XW, Yang JJ, Ren BB, Tan GQ, Ding HG (2009) Reactivity of nitric oxide with the [4Fe-4S] cluster of dihydroxyacid dehydratase from *Escherichia coli*. *Biochem J* 417: 783-789.
2. Rogers PA, Ding HG (2001) L-Cysteine-mediated Destabilization of Dinitrosyl Iron Complexes in Proteins. *J Biol Chem* 276: 30980-30986.
3. Yang JJ, Duan XW, Landry AP, Ding HG (2010) Oxygen is required for the L-cysteine-mediated decomposition of protein-bound dinitrosyl-iron complexes. *Free Radic Biol Med* 49: 268-274.
4. Layer G, Ollagnier-de Choudens S, Sanakis Y, Fontecave M (2006) Iron-Sulfur Cluster Biosynthesis: Characterization of *Escherichia coli* CyaY as an Iron Donor for the Assembly of [2Fe-2S] Clusters in the Scaffold IscU. *J Biol Chem* 281: 16256-16263.
5. Urbina HD, Silberg JJ, Hoff KG, Vickery LE (2001) Transfer of Sulfur from IscS to IscU during Fe/S Cluster Assembly. *J Biol Chem* 276: 44521-44526.
6. Prischi F, Konarev PV, Iannuzzi C, Pastore C, Adinolfi S, et al. (2010) Structural bases for the interaction of frataxin with the central components of iron-sulphur cluster assembly. *Nat Commun* 1: 95.
7. Bonomi F, Iametti S, Ta D, Vickery LE (2005) Multiple Turnover Transfer of [2Fe2S] Clusters by the Iron-Sulfur Cluster Assembly Scaffold Proteins IscU and IscA. *J Biol Chem* 280: 29513-29518.
8. Unciuleac MC, Chandramouli K, Naik S, Mayer S, Huynh BH, et al. (2007) In Vitro Activation of Apo-Aconitase Using a [4Fe-4S] Cluster-Loaded Form of the IscU [Fe-S] Cluster Scaffolding Protein. *Biochemistry* 46: 6812-6821.
9. Dong M, Wang C, Deen WM, Dedon PC (2003) Absence of 2'-Deoxyoxanosine and Presence of Abasic Sites in DNA Exposed to Nitric Oxide at Controlled Physiological Concentrations. *Chem Res Toxicol* 16: 1044-1055.
10. Terato H, Masaoka A, Asagoshi K, Honsho A, Ohyama Y, et al. (2002) Novel repair activities of AlkA (3-methyladenine DNA glycosylase II) and endonuclease VIII for xanthine and oxanine, guanine lesions induced by nitric oxide and nitrous acid. *Nucleic Acids Res* 30: 4975-4984.
11. Zhao BY, O'Brien PJ (2011) Kinetic Mechanism for the Excision of Hypoxanthine by *Escherichia coli* AlkA and Evidence for Binding to DNA Ends. *Biochemistry* 50: 4350-4359.
12. Wong I, Lundquist AJ, Bernards AS, Mosbaugh DW (2002) Presteady-state Analysis of a Single Catalytic Turnover by *Escherichia coli* Uracil-DNA Glycosylase Reveals a "Pinch-Pull-Push" Mechanism. *J Biol Chem* 277: 19424-19432.
13. Gardner AM, Martin LA, Gardner PR, Dou Y, Olson JS (2000) Steady-state and Transient Kinetics of *Escherichia coli* Nitric-oxide Dioxygenase (Flavohemoglobin): The B10 Tyrosine Hydroxyl is Essential for Dioxygen Binding and Catalysis. *J Biol Chem* 275: 12581-12589.
14. Gardner AM, Gardner PR (2002) Flavohemoglobin Detoxifies Nitric Oxide in Aerobic, but not Anaerobic, *Escherichia coli*. Evidence for a Novel Inducible Anaerobic Nitric Oxide-scavenging Activity. *J Biol Chem* 277: 8166-8171.
15. Wheldrake JF (1967) Intracellular Concentration of Cysteine in *Escherichia coli* and its Relation to Repression of the Sulphate-Activating Enzymes. *Biochem J* 105: 697-699.

16. Park S, Imlay JA (2003) High Levels of Intracellular Cysteine Promote Oxidative DNA Damage by Driving the Fenton Reaction. *J Bacteriol* 185: 1942-1950.
17. Sengupta R, Ryter SW, Zuckerbraun BS, Tzeng E, Billiar TR, et al. (2007) Thioredoxin Catalyzes the Denitrosation of Low-Molecular Mass and Protein S-Nitrosothiols. *Biochemistry* 46: 8472-8483.
18. Lillig CH, Prior A, Schwenn JD, Aslund F, Ritz D, et al. (1999) New Thioredoxins and Glutaredoxins as Electron Donors of 3'-Phosphoadenylylsulfate Reductase. *J Biol Chem* 274: 7695-7698.
19. Maynard ND, Macklin DN, Kirkegaard K, Covert MW (2012) Competing pathways control host resistance to virus via tRNA modification and programmed ribosomal frameshifting. *Mol Syst Biol* 8: 567.
20. Fontecave M (2006) Iron-sulfur clusters: ever-expanding roles. *Nat Chem Biol* 2: 171-174.
21. Sundararaj S, Guo A, Habibi-Nazhad B, Rouani M, Stothard P, et al. (2004) The CyberCell Database (CCDB): a comprehensive, self-updating, relational database to coordinate and facilitate in silico modeling of *Escherichia coli*. *Nucleic Acids Res* 32: D293-295.
22. Lehman IR (1974) DNA Ligase: Structure, Mechanism, and Function. *Science* 186: 790-797.
23. Taniguchi Y, Choi PJ, Li GW, Chen H, Babu M, et al. (2010) Quantifying *E. coli* Proteome and Transcriptome with Single-Molecule Sensitivity in Single Cells. *Science* 329: 533-538.
24. Kotte O, Zaugg JB, Heinemann M (2010) Bacterial adaptation through distributed sensing of metabolic fluxes. *Mol Syst Biol* 6: 355.
25. Allen BW, Liu J, Piantadosi CA (2005) Electrochemical Detection of Nitric Oxide in Biological Fluids. *Methods Enzymol* 396: 68-77.
26. Wang C, Trudel LJ, Wogan GN, Deen WM (2003) Thresholds of Nitric Oxide-Mediated Toxicity in Human Lymphoblastoid Cells. *Chem Res Toxicol* 16: 1004-1013.
27. Browning DF, Lee DJ, Spiro S, Busby SJ (2010) Down-Regulation of the *Escherichia coli* K-12 *nrf* Promoter by Binding of the NsrR Nitric Oxide-Sensing Transcription Repressor to an Upstream Site. *J Bacteriol* 192: 3824-3828.
28. Spiro S (2006) Nitric oxide-sensing mechanisms in *Escherichia coli*. *Biochem Soc Trans* 34: 200-202.
