# Supplementary material for: A Kinetic Platform to Determine the Fate of Nitric Oxide in Escherichia coli
Source: PLOS journal article supplement (doi:10.1371/journal.pcbi.1003049), 2013-05-02
Supplement: S20 (10.1371/journal.pcbi.1003049.s020) [file journal.pcbi.1003049.s020]

**Table S6. Experimentally-accessible model parameters varied during parametric analysis.** “Reaction #s” are the numbers of the reactions governed by the rate parameter, and correspond to the numbering in Tables S2–S3, and Text S1. Model parameters were varied among 5 logarithmically-spaced values spanning their allowed range. Allowed parameter ranges (defined by “Min.” and “Max.”) were chosen to span the value obtained or calculated from literature, unless otherwise noted.

| #  | Parameter                                         | Parameter description/reaction involved                        | Reaction #s | Min.                  | Max.                  | Units                        | References       |
|----|---------------------------------------------------|----------------------------------------------------------------|-------------|-----------------------|-----------------------|------------------------------|------------------|
| 1  | $k_{\text{NONOate}}$                              | NO• release from chemical donor                                | 128         | $9.63 \times 10^{-6}$ | $5.78 \times 10^{-3}$ | $\text{s}^{-1}$              | [1] <sup>a</sup> |
| 2  | $[\text{NONOate}]_0$                              | Initial concentration of NONOate                               | --          | $5.0 \times 10^{-5}$  | $5.0 \times 10^{-3}$  | M                            | <sup>b</sup>     |
| 3  | $k_{\text{Hmp-exp,max}}$                          | Hmp expression (maximum rate)                                  | 177         | 0                     | $1.0 \times 10^{-8}$  | $\text{M}\cdot\text{s}^{-1}$ | <sup>c</sup>     |
| 4  | $k_{\text{NorV-exp,max}}$                         | NorV expression (maximum rate)                                 | 178         | 0                     | $1.0 \times 10^{-8}$  | $\text{M}\cdot\text{s}^{-1}$ | <sup>c</sup>     |
| 5  | $k_{\text{NrfA-exp,max}}$                         | NrfA expression (maximum rate)                                 | 179         | 0                     | $1.0 \times 10^{-8}$  | $\text{M}\cdot\text{s}^{-1}$ | <sup>c</sup>     |
| 6  | $[\text{Ala}]_0$                                  | Initial concentration of L-alanine                             | --          | $1.0 \times 10^{-3}$  | $5.0 \times 10^{-3}$  | M                            | [2]              |
| 7  | $[\text{AlkA}]_0$                                 | Initial concentration of DNA glycosylase (dX, dI)              | --          | 0                     | $1.0 \times 10^{-6}$  | M                            | [3]              |
| 8  | $[\text{ATP}]_0$                                  | Initial concentration of ATP                                   | --          | $1.0 \times 10^{-3}$  | $1.5 \times 10^{-2}$  | M                            | [2,4]            |
| 9  | $[\text{Cys}]_0$                                  | Initial concentration of L-cysteine                            | --          | $1.0 \times 10^{-6}$  | $5.0 \times 10^{-4}$  | M                            | [5,6]            |
| 10 | $[\text{Cyd}]_0$                                  | Initial concentration of cytochrome <i>bo</i>                  | --          | 0                     | $1.0 \times 10^{-5}$  | M                            | [3]              |
| 11 | $[\text{Cyo}]_0$                                  | Initial concentration of cytochrome <i>bd</i>                  | --          | 0                     | $1.0 \times 10^{-5}$  | M                            | [3]              |
| 12 | $[\text{Gor}]_0$                                  | Initial concentration of glutathione reductase                 | --          | 0                     | $1.0 \times 10^{-5}$  | M                            | [7]              |
| 13 | $[\text{GS-FDH}]_0$                               | Initial concentration of GSH-dependent FDH                     | --          | 0                     | $1.0 \times 10^{-5}$  | M                            | <sup>d</sup>     |
| 14 | $[\text{GSH}]_0$                                  | Initial concentration of glutathione                           | --          | 0.001                 | 0.05                  | M                            | [2]              |
| 15 | $[\text{P}_{2\text{Fe}2\text{S}}(\text{holo})]_0$ | Initial concentration of <i>holo</i> [2Fe-2S] proteins         | --          | $1.0 \times 10^{-6}$  | $1.0 \times 10^{-4}$  | M                            | [8,9]            |
| 16 | $[\text{P}_{4\text{Fe}4\text{S}}(\text{holo})]_0$ | Initial concentration of <i>holo</i> [4Fe-4S] proteins         | --          | $1.0 \times 10^{-5}$  | 0.001                 | M                            | [8,9]            |
| 17 | $[\text{IscS}]_0$                                 | Initial concentration of IscS                                  | --          | $1.0 \times 10^{-8}$  | $1.0 \times 10^{-5}$  | M                            | [10,11]          |
| 18 | $[\text{IscU}]_0$                                 | Initial concentration of IscU                                  | --          | $1.0 \times 10^{-8}$  | $1.0 \times 10^{-5}$  | M                            | [10,11]          |
| 19 | $[\text{NADH}]_0$                                 | Initial concentration of NADH                                  | --          | $2.0 \times 10^{-5}$  | $2.0 \times 10^{-4}$  | M                            | [2]              |
| 20 | $[\text{NADPH}]_0$                                | Initial concentration of NADPH                                 | --          | $5.0 \times 10^{-5}$  | $5.0 \times 10^{-4}$  | M                            | [2]              |
| 21 | $[\text{O}_2]_0$                                  | Initial concentration of O <sub>2</sub> (media, air, and cell) | --          | 0                     | $2.5 \times 10^{-4}$  | M                            | <sup>e</sup>     |
| 22 | $[\text{SOD}]_0$                                  | Initial concentration of superoxide dismutase                  | --          | 0                     | $1.0 \times 10^{-4}$  | M                            | [12]             |
| 23 | $[\text{Trp}]_0$                                  | Initial concentration of L-tryptophan                          | --          | $2.0 \times 10^{-6}$  | $1.0 \times 10^{-4}$  | M                            | [2]              |
| 24 | $[\text{TrxR}]_0$                                 | Initial concentration of thioredoxin reductase                 | --          | 0                     | $1.0 \times 10^{-5}$  | M                            | <sup>d</sup>     |
| 25 | $[\text{Tyr}]_0$                                  | Initial concentration of L-tyrosine                            | --          | $1.0 \times 10^{-6}$  | $1.0 \times 10^{-4}$  | M                            | [2]              |
| 26 | $[\text{Ung}]_0$                                  | Initial concentration of DNA glycosylase (dU)                  | --          | 0                     | $1.0 \times 10^{-6}$  | M                            | [3]              |
| 27 | $[\text{Xth}]_0$                                  | Initial concentration of DNA exonuclease III                   | --          | 0                     | $1.0 \times 10^{-6}$  | M                            | [3]              |

- The minimum and maximum NONOate release rates correspond to half-lives of 20 h and 2 min, respectively. These values were selected based on the half-lives reported for the slow NO• donor, (Z)-1-[N-(2-aminoethyl)-N-(2-ammonioethyl)amino]diazene-1,2-diolate (DETA NONOate), and the very rapid NO• donor, (Z)-1-[N-methyl-N-[6-(N-methylammoniohexyl)amino]]diazene-1,2-diolate (MAHMA NONOate) [1].
- NONOate concentration range was chosen as one order of magnitude below and above the concentration of NONOate used in this study (0.5 mM).
- The maximum protein expression rates for Hmp, NorV, and NrfA were varied from zero (representing a deletion of the encoding gene) to a value based on the maximum expression rates reported for a number of enzymes in the study by Kotte *et al* [13].
- Concentration was not found in literature, and therefore the maximum value was chosen based on values typically found for a number of other enzymes in the model.
- The culture/intracellular O<sub>2</sub> concentration and the saturation O<sub>2</sub> concentration (in equilibrium with the gas in contact with the media) were varied as a single parameter.

## References

1. Keefer LK, Nims RW, Davies KM, Wink DA (1996) "NONOates" (1-Substituted Diazen-1-ium-1,2-diols) as Nitric Oxide Donors: Convenient Nitric Oxide Dosage Forms. *Methods Enzymol* 268: 281-293.
2. Bennett BD, Kimball EH, Gao M, Osterhout R, Van Dien SJ, et al. (2009) Absolute metabolite concentrations and implied enzyme active site occupancy in *Escherichia coli*. *Nat Chem Biol* 5: 593-599.
3. Taniguchi Y, Choi PJ, Li GW, Chen H, Babu M, et al. (2010) Quantifying *E. coli* Proteome and Transcriptome with Single-Molecule Sensitivity in Single Cells. *Science* 329: 533-538.
4. Buckstein MH, He J, Rubin H (2008) Characterization of Nucleotide Pools as a Function of Physiological State in *Escherichia coli*. *J Bacteriol* 190: 718-726.
5. Wheldrake JF (1967) Intracellular Concentration of Cysteine in *Escherichia coli* and its Relation to Repression of the Sulphate-Activating Enzymes. *Biochem J* 105: 697-699.
6. Park S, Imlay JA (2003) High Levels of Intracellular Cysteine Promote Oxidative DNA Damage by Driving the Fenton Reaction. *J Bacteriol* 185: 1942-1950.
7. Albe KR, Butler MH, Wright BE (1990) Cellular Concentrations of Enzymes and Their Substrates. *J Theor Biol* 143: 163-195.
8. Fontecave M (2006) Iron-sulfur clusters: ever-expanding roles. *Nat Chem Biol* 2: 171-174.
9. Sundararaj S, Guo A, Habibi-Nazhad B, Rouani M, Stothard P, et al. (2004) The CyberCell Database (CCDB): a comprehensive, self-updating, relational database to coordinate and facilitate in silico modeling of *Escherichia coli*. *Nucleic Acids Res* 32: D293-295.
10. Maynard ND, Macklin DN, Kirkegaard K, Covert MW (2012) Competing pathways control host resistance to virus via tRNA modification and programmed ribosomal frameshifting. *Mol Syst Biol* 8: 567.
11. Urbina HD, Silberg JJ, Hoff KG, Vickery LE (2001) Transfer of Sulfur from IscS to IscU during Fe/S Cluster Assembly. *J Biol Chem* 276: 44521-44526.
12. Imlay JA (2008) Cellular Defenses against Superoxide and Hydrogen Peroxide. *Annu Rev Biochem* 77: 755-776.
13. Kotte O, Zaugg JB, Heinemann M (2010) Bacterial adaptation through distributed sensing of metabolic fluxes. *Mol Syst Biol* 6: 355.
