# Supplementary material for: A Kinetic Platform to Determine the Fate of Nitric Oxide in Escherichia coli
Source: PLOS journal article supplement (doi:10.1371/journal.pcbi.1003049), 2013-05-02
Supplement: S22 (10.1371/journal.pcbi.1003049.s022) [file journal.pcbi.1003049.s022]

301 Moved Permanently

# Moved Permanently

The document has moved here.

---

Apache Server at www.ploscompbiol.org Port 80
