# Supplementary material for: A Kinetic Platform to Determine the Fate of Nitric Oxide in Escherichia coli
Source: PLoS Comput Biol. 2013 May 2;9(5):e1003049. doi: 10.1371/journal.pcbi.1003049 (PMC3642044; doi:10.1371/journal.pcbi.1003049)
Supplement: Table S1 — Biochemical species included in the model. All metabolites, enzymes, and biomolecules are listed with their initial concentrations. (XLSX) [file pcbi.1003049.s015.xlsx]

## Sheet: Model Species
Table S1. Biochemical species included in the model. All metabolites, enzymes, and biomolecules are listed with their initial concentrations.
LEGEND:
a.	Initial concentration of metabolites. "*" indicates metabolites whose concentration was varied during parametric analysis and optimization (see Table S4).
b.	Model compartment. I = intracellular, E = extracellular (media).
c.	References are listed at the bottom of the table.
#	Species	Name	Initial Conc. (µM)a	Compartmentb	Notes/Referencesc
1	ATP	Adenosine triphosphate	9600	I	[1] Concentration held constant.
2	ADP	Adenosine diphosphate	560	I	[1]
3	AMP	Adenosine monophosphate	280	I	[1]
4	Ala	L-Alanine	2600	I	[1]
5	CO2	Carbon dioxide	1200	I	[2]
6	CO3•−	Carbonate radical	0	I	Initial concentration assumed to be negligible.
7	CO32−	Carbonate anion	4.8	I	[2]
8	HCO3−	Bicarbonate	10000	I	[2]
9	H2CO3	Carbonic acid	0	I	Initial concentration assumed to be negligible.
10	Cyd	Cytochrome bd	0.252*	I	Calculated assuming 485 CydA enzymes per cell [3], and cellular volume of 3.2 × 10−15 L [4].
11	Cyd-NO	Inhibited (NO•-bound) cytochrome bd	0	I	Initial concentration assumed to be negligible.
12	Cyo	Cytochrome bo	0.059*	I	Calculated assuming 114 CyoD enzymes per cell [3], and cellular volume of 3.2 × 10−15 L [4].
13	Cyo-NO	Inhibited (NO•-bound) cytochrome bo	0	I	Initial concentration assumed to be negligible.
14	Cys	L-Cysteine	98.5*	I	Calculated assuming L-cysteine concentration of 0.22 nmol/mgDW in E. coli grown overnight with 1 mM Na2SO4 as a sulfur source [5], with cell density of 447.76 gDW/L [6]. Others cite concentration to be 200 µM [7]. Concentration held constant.
15	Cys•	L-Cysteinyl radical	0	I	Initial concentration assumed to be negligible.
16	Cys-NO	S-Nitrosocysteine	0	I	Initial concentration assumed to be negligible.
17	dATP	Deoxyadenosine triphosphate	181	I	[8] Concentration held constant.
18	dCTP	Deoxycytosine triphosphate	184	I	[8] Concentration held constant.
19	dGTP	Deoxyguanosine triphosphate	92	I	[8] Concentration held constant.
20	DNA(dA)	DNA-bound deoxyadenosine	11946*	I	Calculated assuming 15 g/L of DNA [6], a cellular volume of 3.2 × 10−15 L [6], and 24.6% adenine content in E. coli K-12 MG1655 chromosome [9].
21	DNA(dC)	DNA-bound deoxycytidine	12329*	I	Calculated assuming 15 g/L of DNA [6], a cellular volume of 3.2 × 10−15 L [6], and 25.4% cytosine content in E. coli K-12 MG1655 chromosome [9].
22	DNA(dG)	DNA-bound deoxyguanosine	12329*	I	Calculated assuming 15 g/L of DNA [6], a cellular volume of 3.2 × 10−15 L [6], and 25.4% guanine content in E. coli K-12 MG1655 chromosome [9].
23	DNA(APA)	DNA AP site (missing adenine)	0	I	Initial concentration assumed to be negligible.
24	DNA(APC)	DNA AP site (missing cytosine)	0	I	Initial concentration assumed to be negligible.
25	DNA(APG)	DNA AP site (missing guanine)	0	I	Initial concentration assumed to be negligible.
26	DNA(dA)gap	DNA backbone single nucleoside gap (missing deoxyadenosine)	0	I	Initial concentration assumed to be negligible.
27	DNA(dC)gap	DNA backbone single nucleoside gap (missing deoxycytidine)	0	I	Initial concentration assumed to be negligible.
28	DNA(dG)gap	DNA backbone single nucleoside gap (missing deoxyguanosine)	0	I	Initial concentration assumed to be negligible.
29	DNA(dA)nick	DNA backbone nick (adjacent to deoxyadenosine)	0	I	Initial concentration assumed to be negligible.
30	DNA(dC)nick	DNA backbone nick (adjacent to deoxycytidine)	0	I	Initial concentration assumed to be negligible.
31	DNA(dG)nick	DNA backbone nick (adjacent to deoxyguanosine)	0	I	Initial concentration assumed to be negligible.
32	DNA(dI)	DNA-bound deoxyinosine	0	I	Initial concentration assumed to be negligible.
33	DNA(dU)	DNA-bound deoxyuridine	0	I	Initial concentration assumed to be negligible.
34	DNA(dX)	DNA-bound deoxyxanthosine	0	I	Initial concentration assumed to be negligible.
35	hX	Hypoxanthine	0	I	Concentration affects no reaction rates. Initial value arbitrarily set to zero.
36	U	Uracil	0	I	Concentration affects no reaction rates. Initial value arbitrarily set to zero.
37	X	Xanthine	0	I	Concentration affects no reaction rates. Initial value arbitrarily set to zero.
38	dR5P	2-Deoxy-D-ribose 5-phosphate	300	I	[1]
39	PPi	Diphosphate	0	I	Concentration affects no reaction rates. Initial value arbitrarily set to zero.
40	AlkA	DNA glycosylase (inosine, xanthosine)	0.001*	I	Calculated assuming 2.0 AlkA enzymes per cell [3], and cellular volume of 3.2 × 10−15 L [4].
41	Ung	DNA glycosylase (uridine)	0.0075*	I	Calculated assuming 14.5 Ung enzymes per cell [3], and cellular volume of 3.2 × 10−15 L [4].
42	Xth	DNA exonuclease III	0.0035*	I	Calculated assuming 6.7 Xth enzymes per cell [3], and cellular volume of 3.2 × 10−15 L [4].
43	PolI	DNA polymerase I	0.15*	I	Calculated to be 0.1 to 0.2 µM assuming 200-400 DNA polymerase I enzymes per cell [10], and cellular volume of 3.2 × 10−15 L [4].
44	LigA	DNA ligase	0.15*	I	Calculated to be 0.1 to 0.2 µM assuming 200-400 DNA ligase enzymes per cell [10], and cellular volume of 3.2 × 10−15 L [4]. Other source measured 22 enzymes per cell [3].
45	GS−	Glutathione (anion)	417	I	Calculated for pH of 7.6, using literature GSH concentration of 17,000 µM [1] and pKa of 9.2 [11].
46	GS•	Glutathionyl radical	0	I	Initial concentration assumed to be negligible.
47	GSH	Reduced glutathione	16583	I	Calculated for pH of 7.6, using literature GSH concentration of 17,000 µM [1] and pKa of 9.2 [11].
48	GSNHOH	GSH-HNO adduct	0	I	Initial concentration assumed to be negligible.
49	GSNO	S-Nitrosoglutathione	0	I	Initial concentration assumed to be negligible.
50	GSNO2	S-Nitroglutathione	0	I	Initial concentration assumed to be negligible.
51	GSO•	Glutathione sulfinyl radical	0	I	Initial concentration assumed to be negligible.
52	GSOH	Glutathione sulfenic acid	0	I	Initial concentration assumed to be negligible.
53	GSOO•	Glutathione peroxysulfenyl radical	0	I	Initial concentration assumed to be negligible.
54	GSOONO2	GSOONO2	0	I	Initial concentration assumed to be negligible.
55	GSSG	Oxidized glutathione (disulfide)	2400	I	[1]
56	GSSG•−	Oxidized glutathionyl radical	0	I	Initial concentration assumed to be negligible.
57	Gor	Glutathione reductase	1.2	I	[12]
58	GS-FDH	Glutathione-dependent formaldehyde dehydrogenase	*	I	Concentration not found in literature
59	HmpFAD,Fe2	Nitric oxide dioxygenase (FAD, ferrous)	0	I	Initial concentration assumed to be negligible.
60	HmpFAD,Fe3	Nitric oxide dioxygenase (FAD, ferric)	0	I	Initial concentration assumed to be negligible.
61	HmpFADH,Fe2	Nitric oxide dioxygenase (FADH, ferrous)	0	I	Initial concentration assumed to be negligible.
62	HmpFADH,Fe3	Nitric oxide dioxygenase (FADH, ferric)	0	I	Initial concentration assumed to be negligible.
63	HmpFADH2,Fe2	Nitric oxide dioxygenase (FADH2, ferrous)	0	I	Initial concentration assumed to be negligible.
64	HmpFADH2,Fe3	Nitric oxide dioxygenase (FADH2, ferric)	0	I	Initial concentration assumed to be negligible.
65	HmpFAD,Fe2(O2)	Nitric oxide dioxygenase (FAD, ferrous), O2-bound	0	I	Initial concentration assumed to be negligible.
66	HmpFAD,Fe2(NO•)	Nitric oxide dioxygenase (FAD, ferrous), NO•-bound	0	I	Initial concentration assumed to be negligible.
67	HmpFAD,Fe3(ONOO−)	Nitric oxide dioxygenase (FAD, ferric), ONOO−-bound	0	I	Initial concentration assumed to be negligible.
68	HmpFADH,Fe2(O2)	Nitric oxide dioxygenase (FADH, ferrous), O2-bound	0	I	Initial concentration assumed to be negligible.
69	HmpFADH,Fe2(NO•)	Nitric oxide dioxygenase (FADH, ferrous), NO•-bound	0	I	Initial concentration assumed to be negligible.
70	HmpFADH,Fe3(ONOO−)	Nitric oxide dioxygenase (FADH, ferric), ONOO−-bound	0	I	Initial concentration assumed to be negligible.
71	HmpFADH2,Fe2(O2)	Nitric oxide dioxygenase (FADH2, ferrous), O2-bound	0	I	Initial concentration assumed to be negligible.
72	HmpFADH2,Fe2(NO•)	Nitric oxide dioxygenase (FADH2, ferrous), NO•-bound	0	I	Initial concentration assumed to be negligible.
73	HmpFADH2,Fe3(ONOO−)	Nitric oxide dioxygenase (FADH2, ferric), ONOO−-bound	0	I	Initial concentration assumed to be negligible.
74	NorVox	Nitric oxide reductase (oxidized flavorubredoxin)	0	I	Initial concentration assumed to be negligible.
75	NorVred	Nitric oxide reductase (reduced flavorubredoxin)	0	I	Initial concentration assumed to be negligible.
76	NrfA	Cytochrome c nitrite reductase	0	I	Initial concentration assumed to be negligible.
77	N2	Dinitrogen	0	I	Concentration affects no reaction rates. Initial value arbitrarily set to zero.
78	N2O	Nitrous oxide	0	I	Concentration affects no reaction rates. Initial value arbitrarily set to zero.
79	N2O2•−	Hyponitrite radical	0	I	Initial concentration assumed to be negligible.
80	N2O3	Nitrous anhydride	0	I, E	Initial concentration assumed to be negligible.
81	N2O4	Dinitrogen tetroxide	0	I, E	Initial concentration assumed to be negligible.
82	N3O3−	Nitrosyl hyponitrite anion	0	I	Initial concentration assumed to be negligible.
83	NMN	Nicotinamide mononucleotide	0	I	Concentration affects no reaction rates. Initial value arbitrarily set to zero.
84	NAD+	Nicotinamide adenine dinucleotide (oxidized)	2600	I	[1] Concentration held constant.
85	NADH	Nicotinamide adenine dinucleotide (reduced)	83	I	[1] Concentration held constant.
86	NADP+	NAD phosphate (oxidized)	2.1	I	[1] Concentration held constant.
87	NADPH	NAD phosphate (reduced)	120	I	[1] Concentration held constant.
88	NH2OH	Hydroxylamine	0	I	Initial concentration assumed to be negligible.
89	NH3	Ammonia	0	I	Concentration affects no reaction rates. Initial value arbitrarily set to zero.
90	NH4+	Ammonium	0	I	Concentration affects no reaction rates. Initial value arbitrarily set to zero.
91	HNO	Nitroxyl	0	I	Initial concentration assumed to be negligible.
92	NO−	Nitroxyl anion	0	I	Initial concentration assumed to be negligible.
93	NO•	Nitric oxide	0	I, E	Initial concentration assumed to be negligible.
94	NO2−	Nitrite	0	I, E	Concentration affects no reaction rates. Initial value arbitrarily set to zero.
95	NO2•	Nitrogen dioxide radical	0	I, E	Initial concentration assumed to be negligible.
96	NO3−	Nitrate	0	I, E	Concentration affects no reaction rates. Initial value arbitrarily set to zero.
97	O2NOO−	Peroxynitrate	0	I	Initial concentration assumed to be negligible.
98	ONOO−	Peroxynitrite	0	I	Initial concentration assumed to be negligible.
99	ONOOH	Peroxynitrous acid	0	I	Initial concentration assumed to be negligible.
100	NONOate	1-Substituted diazen-1-ium-1,2-diolate (NO• donor)	500	E	Experimentally-controlled parameter. A concentration of 0.5 mM was chosen for our experiments.
101	O2	Oxygen	130, 35, and 185	I, E	Concentration of O2 measured in cell culture at time of dose was 130 µM for aerobic conditions (Figure S13, Text S1), and 35 µM for microaerobic (Figure S8, Text S1). The O2 concentration of 100 mM sodium phosphate buffer at 37°C in equilibrium with air (O2,sat) is 185 µM [13].
102	O2•−	Superoxide	7.25 × 10−5	I	Equilibrium concentration calculated assuming 2.9 µM/s O2•− generation rate for E. coli grown in a minimal salts media with glucose [14] and reported superoxide dismutase concentration [15] and kinetics [16].
103	•OH	Hydroxyl radical	0	I	Initial concentration assumed to be negligible.
104	H2O2	Hydrogen peroxide	0	I	Concentration affects no reaction rates. Initial value arbitrarily set to zero.
105	P2Fe2S(holo)	Holo [2Fe-2S] protein	25*	I	Calculated assuming total E. coli protein concentration is 5 mM [6], of which 5% contain [Fe-S] clusters [17], where 90% are [4Fe-4S] and the remaining 10% are [2Fe-2S] [17].
106	P4Fe4S(holo)	Holo [4Fe-4S] protein	225*	I	Calculated assuming total E. coli protein concentration is 5 mM [6], of which 5% contain [Fe-S] clusters [17], where 90% are [4Fe-4S] and the remaining 10% are [2Fe-2S] [17].
107	P2Fe2S(DNIC)2	Protein-bound dinitrosyl iron complex	0	I	Initial concentration assumed to be negligible.
108	P4Fe4S(RRE)2	Protein-bound Roussin’s red ester	0	I	Initial concentration assumed to be negligible.
109	P2Fe2S(apo)	Apo [2Fe-2S] protein	0	I	Initial concentration assumed to be negligible.
110	P4Fe4S(apo)	Apo [4Fe-4S] protein	0	I	Initial concentration assumed to be negligible.
111	DNIC(Cys)2	Cysteine-bound dinitrosyl iron complex	0	I	Initial concentration assumed to be negligible.
112	Fe2+	Ferrous iron	10	I	[18] Concentration held constant.
113	S0	Elemental sulfur	0	I	Concentration affects no reaction rates. Initial value arbitrarily set to zero.
114	S2−	Sulfide	0	I	Concentration affects no reaction rates. Initial value arbitrarily set to zero.
115	IscS	Cysteine desulfurase	1.37*	I	Approximated by [19] to be 1.37 µM based on ~800 IscS proteins per cell reported by [3], and a cellular volume of 10−15 L. Reported by others to be on the order of 10 µM [20].
116	IscU	[Fe-S] cluster assembly scaffold protein (dimer)	0.77*	I	Approximated by [19] to be 0.77 µM based on ~450 IscU proteins per cell reported by [3], and a cellular volume of 10−15 L. Reported by others to be on the order of 10 µM [20].
117	IscU(2S)2−	2S-loaded form of IscU	0	I	Initial concentration assumed to be negligible.
118	IscU([2Fe-2S])2−	[2Fe-2S]-loaded form of IscU	0	I	Initial concentration assumed to be negligible.
119	IscU([2Fe-2S]-2S)4−	[2Fe-2S]-loaded form of IscU, with 2S on other monomer	0	I	Initial concentration assumed to be negligible.
120	IscU([2Fe-2S]2)4−	IscU dimer with a [2Fe-2S] loaded on each monomer	0	I	Initial concentration assumed to be negligible.
121	SOD	Superoxide dismutase	20	I	[15]
122	Trp	L-Tryptophan	12	I	[1]
123	Trp•	L-Tryptophanyl radical	0	I	Initial concentration assumed to be negligible.
124	Trp-OH	5-Hydroxytryptophan	0	I	Initial concentration assumed to be negligible.
125	Trxox	Thioredoxin (oxidized)	0	I	Concentration affects no reaction rates. Initial value arbitrarily set to zero.
126	Trxred	Thioredoxin (reduced)	10*	I	Reported to be approximately 10 µM by [21]. Physiological range also documented as 5 to 50 µM [22].
127	TrxR	Thioredoxin reductase	0.42	I	Calculated based on 808 TrxR enzymes per cell when growing in MOPS minimal glucose media [6], and a cellular volume of 3.2 × 10−15 L [4].
128	Tyr	L-Tyrosine	29	I	[1]
129	Tyr•	L-Tyrosyl radical	0	I	Initial concentration assumed to be negligible.
130	Tyr-NO	3-Nitrosotyrosine	0	I	Initial concentration assumed to be negligible.
131	Tyr-NO2	3-Nitrotyrosine	0	I	Initial concentration assumed to be negligible.
132	Tyr-Tyr	3,3-Dityrosine	0	I	Initial concentration assumed to be negligible.
REFERENCES
[1]	Bennett BD, Kimball EH, Gao M, Osterhout R, Van Dien SJ, et al. (2009) Absolute metabolite concentrations and implied enzyme active site occupancy in Escherichia coli. Nat Chem Biol 5: 593-599.
[2]	Lim CH, Dedon PC, Deen WA (2008) Kinetic Analysis of Intracellular Concentrations of Reactive Nitrogen Species. Chem Res Toxicol 21: 2134-2147.
[3]	Taniguchi Y, Choi PJ, Li GW, Chen H, Babu M, et al. (2010) Quantifying E. coli Proteome and Transcriptome with Single-Molecule Sensitivity in Single Cells. Science 329: 533-538.
[4]	Volkmer B, Heinemann M (2011) Condition-Dependent Cell Volume and Concentration of Escherichia coli to Facilitate Data Conversion for Systems Biology Modeling. PLoS One 6: e23126.
[5]	Wheldrake JF (1967) Intracellular Concentration of Cysteine in Escherichia coli and its Relation to Repression of the Sulphate-Activating Enzymes. Biochem J 105: 697-699.
[6]	Sundararaj S, Guo A, Habibi-Nazhad B, Rouani M, Stothard P, et al. (2004) The CyberCell Database (CCDB): a comprehensive, self-updating, relational database to coordinate and facilitate in silico modeling of Escherichia coli. Nucleic Acids Res 32: D293-295.
[7]	Park S, Imlay JA (2003) High Levels of Intracellular Cysteine Promote Oxidative DNA Damage by Driving the Fenton Reaction. J Bacteriol 185: 1942-1950.
[8]	Buckstein MH, He J, Rubin H (2008) Characterization of Nucleotide Pools as a Function of Physiological State in Escherichia coli. J Bacteriol 190: 718-726.
[9]	Kanehisa M, Goto S (2000) KEGG: kyoto encyclopedia of genes and genomes. Nucleic Acids Res 28: 27-30.
[10]	Lehman IR (1974) DNA Ligase: Structure, Mechanism, and Function. Science 186: 790-797.
[11]	Kirsch M, Lehnig M, Korth HG, Sustmann R, de Groot H (2001) Inhibition of Peroxynitrite-Induced Nitration of Tyrosine by Glutathione in the Presence of Carbon Dioxide through both Radical Repair and Peroxynitrate Formation. Chemistry 7: 3313-3320.
[12]	Albe KR, Butler MH, Wright BE (1990) Cellular Concentrations of Enzymes and Their Substrates. J Theor Biol 143: 163-195.
[13]	Schmidt K, Desch W, Klatt P, Kukovetz WR, Mayer B (1997) Release of nitric oxide from donors with known half-life: a mathematical model for calculating nitric oxide concentrations in aerobic solutions. Naunyn Schmiedebergs Arch Pharmacol 355: 457-462.
[14]	Imlay JA, Fridovich I (1991) Assay of Metabolic Superoxide Production in Escherichia coli. J Biol Chem 266: 6957-6965.
[15]	Imlay JA (2008) Cellular Defenses against Superoxide and Hydrogen Peroxide. Annu Rev Biochem 77: 755-776.
[16]	Falconi M, O'Neill P, Stroppolo ME, Desideri A (2002) Superoxide Dismutase Kinetics. Methods Enzymol 349: 38-49.
[17]	Fontecave M (2006) Iron-sulfur clusters: ever-expanding roles. Nat Chem Biol 2: 171-174.
[18]	Keyer K, Imlay JA (1996) Superoxide accelerates DNA damage by elevating free-iron levels. Proc Natl Acad Sci U S A 93: 13635-13640.
[19]	Maynard ND, Macklin DN, Kirkegaard K, Covert MW (2012) Competing pathways control host resistance to virus via tRNA modification and programmed ribosomal frameshifting. Mol Syst Biol 8: 567.
[20]	Urbina HD, Silberg JJ, Hoff KG, Vickery LE (2001) Transfer of Sulfur from IscS to IscU during Fe/S Cluster Assembly. J Biol Chem 276: 44521-44526.
[21]	Lillig CH, Prior A, Schwenn JD, Aslund F, Ritz D, et al. (1999) New Thioredoxins and Glutaredoxins as Electron Donors of 3 '-Phosphoadenylylsulfate Reductase. J Biol Chem 274: 7695-7698.
[22]	Sengupta R, Ryter SW, Zuckerbraun BS, Tzeng E, Billiar TR, et al. (2007) Thioredoxin Catalyzes the Denitrosation of Low-Molecular Mass and Protein S-Nitrosothiols. Biochemistry 46: 8472-8483.
