# Supplementary material for: A Kinetic Platform to Determine the Fate of Nitric Oxide in Escherichia coli
Source: PLoS Comput Biol. 2013 May 2;9(5):e1003049. doi: 10.1371/journal.pcbi.1003049 (PMC3642044; doi:10.1371/journal.pcbi.1003049)
Supplement: Table S2 — Model reactions governed by elementary-type rate expressions. Reactions are listed along with the value of their associated rate constant. (XLSX) [file pcbi.1003049.s016.xlsx]

## Sheet: Model Reactions
Table S2. Model reactions governed by elementary-type rate expressions. Reactions are listed along with the value of their associated rate constant.
LEGEND:
a.	Reaction rate constant. "*" indicates reaction rate constants varied during parametric analysis and optimization (see Table S4).
b.	Model compartment. I = intracellular, E = extracellular (media).
c.	References are listed at the bottom of the table.
#	Reaction	Rate constanta	Units	Compartmentb	Notes/Referencec
1	2 NO• + O2 → 2 NO2•	1.8 × 106	M−2s−1	I, E	Measured in our system (Figure S3, Text S1). Parameter range reported by [1].
2	NO• + NO2• → N2O3	1.1 × 109	M−1s−1	I, E	[2]
3	N2O3 → NO• + NO2•	8.1 × 104	s−1	I, E	[2]
4	N2O3 + H2O → 2 NO2− + 2 H+	2.1 × 104	s−1	I, E	[3]
5	2 NO2• → N2O4	4.5 × 108	M−1s−1	I, E	[3]
6	N2O4 → 2 NO2•	6.9 × 103	s−1	I, E	[3]
7	N2O4 + H2O → NO2− + NO3− + 2 H+	1.0 × 103	s−1	I, E	[3]
8	NO• + O2•− → ONOO−	1.0 × 1010	M−1s−1	I	[3]
9	NO2• + O2•− → O2NOO−	4.5 × 109	M−1s−1	I	[4]
10	O2NOO− → O2 + NO2−	0.7	s−1	I	[4]
11	•OH + NO• → NO2− + H+	1.0 × 109	M−1s−1	I	Assumed rapid dissociation of the product, HNO2 [3].
12	ONOO− + H+ → ONOOH	2.5 × 103	s−1	I	[4]
13	ONOOH → ONOO− + H+	1.6 × 104	s−1	I	[4]
14	ONOOH → NO3− + H+	0.7	s−1	I	[4]
15	ONOOH → NO2• + •OH	0.3	s−1	I	[4]
16	•OH + ONOO− → H+ + O2•− + NO2−	4.8 × 109	M−1s−1	I	[3]
17	•OH + O2•− → O2 + OH−	1.0 × 1010	M−1s−1	I	[3]
18	NO− + H2O → HNO + OH−	120	s−1	I	Rate is slower than expected due to spin-forbidden protonation [5].
19	HNO + OH− → NO− + H2O	0.0195	s−1	I	Rate constant calculated from literature value for a pH of 7.6 [5].
20	2 HNO → H2O + N2O	8 × 106	M−1s−1	I	HNO dimerization and subsequent hyrolysis was combined into a single reaction [5].
21	HNO + NO• → N2O2•− + H+	5.8 × 106	M−1s−1	I	[5]
22	N2O2•− + H+ → HNO + NO•	8 × 106	s−1	I	[5]
23	N2O2•− + NO• → N3O3−	4 × 106	M−1s−1	I	[6]
24	N3O3− → NO2− + N2O	330	s−1	I	[6]
25	HNO + NADH + H+ → NH2OH + NAD+	1.1 × 104	M−1s−1	I	Literature value was measured at pH 7.4, 23°C [7]
26	HNO + NADPH + H+ → NH2OH + NADP+	1.3 × 104	M−1s−1	I	Literature value was measured at pH 7.4, 23°C [7]
27	HNO + NH2OH → 2 H2O + N2	4.0 × 103	M−1s−1	I	Literature value was measured at pH 7.4, 23°C [7]
28	CO2 + H2O → H2CO3	0.03	s−1	I	[8]
29	H2CO3 → CO2 + H2O	20	s−1	I	[8]
30	H2CO3 + OH− → HCO3− + H2O	1.0 × 103	s−1	I	Value of rate constant is assumed. Rate was reported as "instantaneous" [8].
31	HCO3− + H2O → H2CO3 + OH−	0.1	s−1	I	Calculated for pH of 7.6 [8].
32	GS− + H+ → GSH	2.5 × 103	s−1	I	[4]
33	GSH → GS− + H+	63.1	s−1	I	[4]
34	GSH + NO2• → GS• + NO2− + H+	2.0 × 107	M−1s−1	I	[3]
35	GS− + NO2• → GS• + NO2−	2.4 × 108	M−1s−1	I	[4]
36	GSH + N2O3 → GSNO + NO2− + H+	6.6 × 107	M−1s−1	I	[3]
37	GS• + NO• → GSNO	2.8 × 107	M−1s−1	I	[2]
38	2 GS• → GSSG	7.5 × 108	M−1s−1	I	[3]
39	GS• + O2 → GSOO•	2.0 × 109	M−1s−1	I	[3]
40	GSOO• → GS• + O2	6.2 × 105	s−1	I	[3]
41	GS• + GS− → GSSG•−	6 × 108	M−1s−1	I	[3]
42	GSSG•− → GS• + GS−	1.6 × 105	s−1	I	[3]
43	GSSG•− + O2 → GSSG + O2•−	5 × 109	M−1s−1	I	[2]
44	GS• + GSNO → GSSG + NO•	1.7 × 109	M−1s−1	I	[3]
45	2 GSNO + O2•− + H2O → GSSG•− + NO3− + NO2− + 2 H+	6 × 108	M−2s−1	I	[9]
46	GSOO• + GSNO → GSSG + O2 + NO•	3.8 × 108	M−1s−1	I	[3]
47	GSNO + GSH → GSSG + HNO	0.007	M−1s−1	I	Reaction products shown are according to literature [10], though other potential pathways are reported to exist [11].
48	GSNO + Cys → GSH + Cys-NO	71.5	M−1s−1	I	Value is the average of the two reported rate constants, 60 and 83 M−1s−1 [12].
49	Cys-NO + GSH → GSNO + Cys	88	M−1s−1	I	Value is the average of the two reported rate constants, 74 and 102 M−1s−1 [12].
50	GSOO• + NO2• → GSOONO2	1 × 109	M−1s−1	I	[3]
51	GSOONO2 → GSOO• + NO2•	0.75	s−1	I	[3]
52	GSOO• + GSH → GSO• + GSOH	2 × 106	M−1s−1	I	[3]
53	GSH + HNO → GSNHOH	6 × 105	M−1s−1	I	Reaction obtained from [10]. Rate constant obtained from [7].
54	GSNHOH + GSH → GSSG + NH2OH	1 × 109	M−1s−1	I	GSH-HNO adduct (GSNHOH) is unstable [10], so a large rate constant was assumed. Other pathways may exist [10].
55	ONOO− + GSH → GSOH + NO2−	660	M−1s−1	I	[3]
56	ONOOH + GSH → GSNO2 + H2O	1.35 × 103	M−1s−1	I	[4]
57	GSOH + GSH → GSSG + H2O	720	M−1s−1	I	[3]
58	•OH + GSH → GS• + H2O	1.4 × 1010	M−1s−1	I	[3]
59	CO3•− + GSH → HCO3− + GS•	5.3 × 106	M−1s−1	I	[3]
60	GS− + CO3•− → GS• + CO32−	7.1 × 108	M−1s−1	I	[4]
61	O2•− + GSH + H+ → GS• + H2O2	200	M−1s−1	I	[3]
62	Tyr• + GSH → GS• + Tyr	3.5 × 105	M−1s−1	I	[3]
63	GS• + Tyr → Tyr• + GSH	3.5 × 105	M−1s−1	I	[3]
64	GSO• + GSH → GSOH + GS•	1 × 105	M−1s−1	I	[3]
65	ONOO− + CO2 → NO2• + CO3•−	1 × 104	M−1s−1	I	[3]
66	ONOO− + CO2 → NO3− + CO2	2 × 104	M−1s−1	I	[3]
67	CO3•− + O2•− + H+ → HCO3− + O2	4 × 108	M−1s−1	I	[3]
68	CO3•− + NO• + OH− → HCO3− + NO2−	3.5 × 109	M−1s−1	I	[3]
69	CO3•− + Tyr → HCO3− + Tyr•	4.5 × 107	M−1s−1	I	[3]
70	NO2• + Tyr → NO2− + Tyr•	3.2 × 105	M−1s−1	I	Value reported for pH 7.5 [3].
71	Tyr• + NO• → Tyr-NO	1 × 109	M−1s−1	I	[3]
72	Tyr-NO → Tyr• + NO•	1 × 103	s−1	I	[3]
73	2 Tyr• → Tyr-Tyr	4 × 107	M−1s−1	I	[3]
74	NO2• + Tyr• → Tyr-NO2	1.3 × 109	M−1s−1	I	[3]
75	Trp + •OH → Trp-OH	1.3 × 1010	M−1s−1	I	[3]
76	Cys + •OH → Cys• + H2O	4.7 × 1010	M−1s−1	I	Value reported for pH 7 [3].
77	•OH + NO2− → NO2• + OH−	5.3 × 109	M−1s−1	I	[3]
78	•OH + CO32− → CO3•− + OH−	3 × 108	M−1s−1	I	[3]
79	•OH + HCO3− → H2O + CO3•−	8.5 × 106	M−1s−1	I	[3]
80	Trp + CO3•− → HCO3− + Trp•	7 × 108	M−1s−1	I	Value reported for pH 7 [3].
81	Cys + CO3•− → Cys• + HCO3−	4.6 × 107	M−1s−1	I	Value reported for pH 7 [3].
82	Trp + NO2• → NO2− + Trp•	1 × 106	M−1s−1	I	Value reported for pH 6.5 [3].
83	Cys + NO2• → NO2− + Cys• + H+	5 × 107	M−1s−1	I	Value reported for pH 7.4 [3].
84	Trxred + GSSG → Trxox + 2 GSH	100	M−1s−1	I	Value reported for pH 7.5, 25°C [13].
85	(0.5) P2Fe2S(holo) + 2 NO• → (0.5) P2Fe2S(DNIC)2 + S0	7.0 × 106 *	M−2s−1	I	Reaction rate assumed to be similar to that of [4Fe-4S] cluster [14].
86	(0.25) P4Fe4S(holo) + 2 NO• → (0.25) P4Fe4S(RRE)2 + (0.75) S0 + (0.25) S2−	7.0 × 106 *	M−2s−1	I	Rate constant for nitrosylation of E. coli Acon B and IlvD [4Fe-4S] clusters [14].
87	P2Fe2S(DNIC)2 + 4 Cys → P2Fe2S(apo) + 2 DNIC(Cys)2	15.3 *	M−1s−1	I	Rate approximated from [15] and [16]. See Text S1 for more detail.
88	P2Fe2S(apo) + 2 DNIC(Cys)2 → P2Fe2S(DNIC)2 + 4 Cys	15.3 *	M−1s−1	I	Rate approximated from [15] and [16]. See Text S1 for more detail.
89	P4Fe4S(RRE)2 + 8 Cys → P4Fe4S(apo) + 4 DNIC(Cys)2 + 4 H+	15.3 *	M−1s−1	I	Rate approximated from [15] and [16]. See Text S1 for more detail.
90	P4Fe4S(apo) + 4 DNIC(Cys)2 + 4 H+ → P4Fe4S(RRE)2 + 8 Cys	15.3 *	M−1s−1	I	Rate approximated from [15] and [16]. See Text S1 for more detail.
91	DNIC(Cys)2 + O2 + 2 H+ + e− → 2 Cys + Fe2+ + 2 NO2−	12.5 *	M−1s−1	I	Calculated based on reported half-life of 5 min in aerobic conditions [16]. See Text S1 for more detail.
92	IscU(2S)2− + 2 Fe2+ + Trxred → IscU([2Fe-2S])2− + Trxox + 4 H+	2.1 × 10−3 *	s−1	I	First-order rate constant for [Fe-S] formation on IscU using E. coli CyaY as Fe2+ donor [17].
93	IscU([2Fe-2S]-2S)4− + 2 Fe2+ + Trxred → IscU([2Fe-2S]2)4− + Trxox + 4 H+	2.1 × 10−3 *	s−1	I	First-order rate constant for [Fe-S] formation on IscU using E. coli CyaY as Fe2+ donor [17].
94	IscU([2Fe-2S]2)4− + 2 Fdxred + 4 H+ + P4Fe4S(apo) → IscU + P4Fe4S(holo) + 2 Fdxox	183.3 *	M−1s−1	I	Rate constant is for transfer of IscU-bound [4Fe-4S] cluster into apo AcnA at 22°C [18].
95	DNA(dA) + N2O3 → DNA(dI) + N2 + NO2− + H+	1.2 × 105 *	M−1s−1	I	[19]
96	DNA(dC) + N2O3 → DNA(dU) + N2 + NO2− + H+	1.2 × 105 *	M−1s−1	I	[19]
97	DNA(dG) + N2O3 → DNA(dX) + N2 + NO2− + H+	1.2 × 105 *	M−1s−1	I	[19]
98	HmpFAD,Fe3 + NADH + H+ → HmpFADH2,Fe3 + NAD+	7.00 × 107	M−1s−1	I	[20]
99	HmpFAD,Fe3 + NADPH + H+ → HmpFADH2,Fe3 + NADP+	1.86 × 106	M−1s−1	I	Calculated from Km,NADPH measured at 20°C and Vmax at 37°C [20].
100	HmpFADH2,Fe3 → HmpFADH,Fe2 + H+	150	s−1	I	Rate measured at 20°C [20].
101	HmpFADH,Fe2 + O2 → HmpFADH,Fe2(O2)	7.50 × 106	M−1s−1	I	[20]
102	HmpFADH,Fe2(O2) → HmpFADH,Fe2 + O2	0.44	s−1	I	Rate measured at 20°C, pH of 7 [20].
103	HmpFADH,Fe2(O2) + NO• → HmpFADH,Fe3(ONOO−)	2.40 × 109 *	M−1s−1	I	[20]. Reported rate varies (see Text S1).
104	HmpFADH,Fe3(ONOO−) → HmpFADH,Fe3 + NO3−	200	s−1	I	[20]
105	HmpFADH,Fe3 → HmpFAD,Fe2 + H+	150	s−1	I	Rate measured at 20°C [20].
106	HmpFAD,Fe2 + O2 → HmpFAD,Fe2(O2)	7.50 × 106	M−1s−1	I	[20]
107	HmpFAD,Fe2(O2) → HmpFAD,Fe2 + O2	0.44	s−1	I	Rate measured at 20°C, pH of 7 [20].
108	HmpFAD,Fe2(O2) + NO• → HmpFAD,Fe3(ONOO−)	2.40 × 109 *	M−1s−1	I	[20]. Reported rate varies (see Text S1).
109	HmpFAD,Fe3(ONOO−) → HmpFAD,Fe3 + NO3−	200	s−1	I	[20]
110	HmpFADH,Fe2 + NO• → HmpFADH,Fe2(NO)	2.60 × 107 *	M−1s−1	I	Rate measured at 20°C, pH of 7 [20]. Also report rate of 4.0 × 106 M−1s−1 (see Text S1).
111	HmpFADH,Fe2(NO) → HmpFADH,Fe2 + NO•	2.00 × 10−4	s−1	I	Rate measured at 20°C, pH of 7 [20].
112	HmpFADH,Fe2(NO) → HmpFADH,Fe3 + NO−	0.14	s−1	I	[20]
113	HmpFAD,Fe2 + NO• → HmpFAD,Fe2(NO)	2.60 × 107 *	M−1s−1	I	Rate measured at 20°C, pH of 7 [20]. Also report rate of 4.0 × 106 M−1s−1 (see Text S1).
114	HmpFAD,Fe2(NO) → HmpFAD,Fe2 + NO•	2.00 × 10−4	s−1	I	Rate measured at 20°C, pH of 7 [20].
115	HmpFAD,Fe2(NO) → HmpFAD,Fe3 + NO−	0.14	s−1	I	[20]
116	HmpFAD,Fe2 + NADH + H+ → HmpFADH2,Fe2 + NAD+	7.00 × 107	M−1s−1	I	[20]
117	HmpFAD,Fe2 + NADPH + H+ → HmpFADH2,Fe2 + NADP+	1.86 × 106	M−1s−1	I	Calculated from Km,NADPH measured at 20°C and Vmax at 37°C [20].
118	HmpFADH2,Fe2 + NO• → HmpFADH2,Fe2(NO)	2.60 × 107 *	M−1s−1	I	Rate measured at 20°C, pH of 7 [20]. Also report rate of 4.0 × 106 M−1s−1 (see Text S1).
119	HmpFADH2,Fe2(NO) → HmpFADH2,Fe2 + NO•	2.00 × 10−4	s−1	I	Rate measured at 20°C, pH of 7 [20].
120	HmpFADH2,Fe2(NO) → HmpFADH2,Fe3 + NO−	0.14	s−1	I	[20]
121	HmpFADH2,Fe2 + O2 → HmpFADH2,Fe2(O2)	7.50 × 106	M−1s−1	I	[20]
122	HmpFADH2,Fe2(O2) → HmpFADH2,Fe2 + O2	0.44	s−1	I	Rate measured at 20°C, pH of 7 [20].
123	HmpFAD,Fe2(O2) + NADH + H+ → HmpFADH2,Fe2(O2) + NAD+	7.00 × 107	M−1s−1	I	[20]
124	HmpFAD,Fe2(O2) + NADPH + H+ → HmpFADH2,Fe2(O2) + NADP+	1.86 × 106	M−1s−1	I	Calculated from Km,NADPH measured at 20°C and Vmax at 37°C [20].
125	HmpFADH2,Fe2(O2) + NO• → HmpFADH2,Fe3(ONOO−)	2.40 × 109 *	M−1s−1	I	[20]. Reported rate varies (see Text S1).
126	HmpFADH2,Fe3(ONOO−) → HmpFADH,Fe2 + NO3− + H+	200	s−1	I	[20]
127	2 O2•− + 2 H+ → O2 + H2O2	2.40 × 10−9	M−1s−1	I	Superoxide dismutase, k = kcat/Km [21]
128	NONOate → 2 NO•	1.34 × 10−4	s−1	E	Rate shown was measured for DPTA NONOate in our system (Figure S3, Text S1). PAPA NONOate was measured to be 1.35 × 10−3 s−1 (Figure S7, Text S1).
129	NO• → gas	4.74 × 10−3	s−1	E	Loss of NO• to the gas phase. Measured in our experimental system (Text S1).
130	→ O2•−	2.9 × 10−6	M∙s−1	I	Constant generation of O2•− within E. coli due to respiration (growing on minimal medium) [22].
131	HmpFAD,Fe2 →	2.8 × 10−5	s−1	I	General protein degradation rate [23].
132	HmpFADH,Fe2 →	2.8 × 10−5	s−1	I	General protein degradation rate [23].
133	HmpFADH2,Fe2 →	2.8 × 10−5	s−1	I	General protein degradation rate [23].
134	HmpFAD,Fe3 →	2.8 × 10−5	s−1	I	General protein degradation rate [23].
135	HmpFADH,Fe3 →	2.8 × 10−5	s−1	I	General protein degradation rate [23].
136	HmpFADH2,Fe3 →	2.8 × 10−5	s−1	I	General protein degradation rate [23].
137	HmpFAD,Fe2(O2) → O2	2.8 × 10−5	s−1	I	General protein degradation rate [23]. Assumed that bound O2 is released.
138	HmpFADH,Fe2(O2) → O2	2.8 × 10−5	s−1	I	General protein degradation rate [23]. Assumed that bound O2 is released.
139	HmpFADH2,Fe2(O2) → O2	2.8 × 10−5	s−1	I	General protein degradation rate [23]. Assumed that bound O2 is released.
140	HmpFAD,Fe2(NO•) → NO•	2.8 × 10−5	s−1	I	General protein degradation rate [23]. Assumed that bound NO• is released.
141	HmpFADH,Fe2(NO•) → NO•	2.8 × 10−5	s−1	I	General protein degradation rate [23]. Assumed that bound NO• is released.
142	HmpFADH2,Fe2(NO•) → NO•	2.8 × 10−5	s−1	I	General protein degradation rate [23]. Assumed that bound NO• is released.
143	HmpFAD,Fe3(ONOO−) → NO• + O2	2.8 × 10−5	s−1	I	General protein degradation rate [23]. Assumed that bound NO• and O2 are released.
144	HmpFADH,Fe3(ONOO−) → NO• + O2	2.8 × 10−5	s−1	I	General protein degradation rate [23]. Assumed that bound NO• and O2 are released.
145	HmpFADH2,Fe3(ONOO−) → NO• + O2	2.8 × 10−5	s−1	I	General protein degradation rate [23]. Assumed that bound NO• and O2 are released.
146	NorVox + O2 →	11.6 *	M−1s−1	I	Calculated based on the 5 min half-life of NorV activity decay under aerobic conditions [24]. See Text S1.
147	NorVred + O2 →	11.6 *	M−1s−1	I	Calculated based on the 5 min half-life of NorV activity decay under aerobic conditions [24]. See Text S1.
148	NorVox →	2.8 × 10−5	s−1	I	General protein degradation rate [23].
149	NorVred →	2.8 × 10−5	s−1	I	General protein degradation rate [23].
150	NrfA →	2.8 × 10−5	s−1	I	General protein degradation rate [23].
REFERENCES
[1]	Lewis RS, Deen WM (1994) Kinetics of the Reaction of Nitric Oxide with Oxygen in Aqueous Solutions. Chem Res Toxicol 7: 568-574.
[2]	Keszler A, Zhang Y, Hogg N (2010) Reaction between nitric oxide, glutathione, and oxygen in the presence and absence of protein: How are S-nitrosothiols formed? Free Radic Biol Med 48: 55-64.
[3]	Lim CH, Dedon PC, Deen WA (2008) Kinetic Analysis of Intracellular Concentrations of Reactive Nitrogen Species. Chem Res Toxicol 21: 2134-2147.
[4]	Kirsch M, Lehnig M, Korth HG, Sustmann R, de Groot H (2001) Inhibition of Peroxynitrite-Induced Nitration of Tyrosine by Glutathione in the Presence of Carbon Dioxide through both Radical Repair and Peroxynitrate Formation. Chemistry 7: 3313-3320.
[5]	Shafirovich V, Lymar SV (2002) Nitroxyl and its anion in aqueous solutions: Spin states, protic equilibria, and reactivities toward oxygen and nitric oxide. Proc Natl Acad Sci U S A 99: 7340-7345.
[6]	Miranda KM (2005) The chemistry of nitroxyl (HNO) and implications in biology. Coord Chem Rev 249: 433-455.
[7]	Jackson MI, Han TH, Serbulea L, Dutton A, Ford E, et al. (2009) Kinetic feasibility of nitroxyl reduction by physiological reductants and biological implications. Free Radic Biol Med 47: 1130-1139.
[8]	Kern DM (1960) The Hydration of Carbon Dioxide. J Chem Educ 37: 14-23.
[9]	Jourd'heuil D, Mai CT, Laroux FS, Wink DA, Grisham MB (1998) The Reaction of S-Nitrosoglutathione with Superoxide. Biochem Biophys Res Commun 244: 525-530.
[10]	Wong PS-Y, Hyun J, Fukuto JM, Shirota FN, DeMaster EG, et al. (1998) Reaction between S-Nitrosothiols and Thiols: Generation of Nitroxyl (HNO) and Subsequent Chemistry. Biochemistry 37: 5362-5371.
[11]	Singh SP, Wishnok JS, Keshive M, Deen WM, Tannenbaum SR (1996) The chemistry of the S-nitrosoglutathione/glutathione system. Proc Natl Acad Sci U S A 93: 14428-14433.
[12]	Meyer DJ, Kramer H, Ozer N, Coles B, Ketterer B (1994) Kinetics and equilibria of S-nitrosothiol-thiol exchange between glutathione, cysteine, penicillamines and serum albumin. FEBS Lett 345: 177-180.
[13]	Nikitovic D, Holmgren A (1996) S-nitrosoglutathione is cleaved by the thioredoxin system with liberation of glutathione and redox regulating nitric oxide. J Biol Chem 271: 19180-19185.
[14]	Duan XW, Yang JJ, Ren BB, Tan GQ, Ding HG (2009) Reactivity of nitric oxide with the [4Fe-4S] cluster of dihydroxyacid dehydratase from Escherichia coli. Biochem J 417: 783-789.
[15]	Rogers PA, Ding HG (2001) L-Cysteine-mediated Destabilization of Dinitrosyl Iron Complexes in Proteins. J Biol Chem 276: 30980-30986.
[16]	Yang JJ, Duan XW, Landry AP, Ding HG (2010) Oxygen is required for the L-cysteine-mediated decomposition of protein-bound dinitrosyl-iron complexes. Free Radic Biol Med 49: 268-274.
[17]	Layer G, Ollagnier-de Choudens S, Sanakis Y, Fontecave M (2006) Iron-Sulfur Cluster Biosynthesis: Characterization of Escherichia coli CyaY as an Iron Donor for the Assembly of [2Fe-2S] Clusters in the Scaffold IscU. J Biol Chem 281: 16256-16263.
[18]	Unciuleac MC, Chandramouli K, Naik S, Mayer S, Huynh BH, et al. (2007) In Vitro Activation of Apo-Aconitase Using a [4Fe-4S] Cluster-Loaded Form of the IscU [Fe-S] Cluster Scaffolding Protein. Biochemistry 46: 6812-6821.
[19]	Dong M, Wang C, Deen WM, Dedon PC (2003) Absence of 2'-Deoxyoxanosine and Presence of Abasic Sites in DNA Exposed to Nitric Oxide at Controlled Physiological Concentrations. Chem Res Toxicol 16: 1044-1055.
[20]	Gardner AM, Martin LA, Gardner PR, Dou Y, Olson JS (2000) Steady-state and Transient Kinetics of Escherichia coli Nitric-oxide Dioxygenase (Flavohemoglobin): The B10 Tyrosine Hydroxyl is Essential for Dioxygen Binding and Catalysis. J Biol Chem 275: 12581-12589.
[21]	Falconi M, O'Neill P, Stroppolo ME, Desideri A (2002) Superoxide Dismutase Kinetics. Methods Enzymol 349: 38-49.
[22]	Imlay JA, Fridovich I (1991) Assay of Metabolic Superoxide Production in Escherichia coli. J Biol Chem 266: 6957-6965.
[23]	Kotte O, Zaugg JB, Heinemann M (2010) Bacterial adaptation through distributed sensing of metabolic fluxes. Mol Syst Biol 6: 355.
[24]	Gardner AM, Gardner PR (2002) Flavohemoglobin Detoxifies Nitric Oxide in Aerobic, but not Anaerobic, Escherichia coli. Evidence for a Novel Inducible Anaerobic Nitric Oxide-scavenging Activity. J Biol Chem 277: 8166-8171.
